# Supplementary material for: Adaptive differentiation coincides with local bioclimatic conditions along an elevational cline in populations of a lichen-forming fungus
Source: Springer Nature journal article supplement (doi:10.1186/s12862-017-0929-8), 2017-03-30
Supplement: MOESM1 [file 12862_2017_929_MOESM1_ESM.pdf]

**Additional file 1.** Temperature data (in °C) collected between May 28th 2014 and June 2nd 2015 from loggers positioned at the level of *L. pustulata* thalli (two loggers per population).

| <b>Months</b>                            | <b>Pool1</b> | <b>Pool2</b> | <b>Pool3</b> | <b>Pool4</b> | <b>Pool5</b> | <b>Pool6</b> |
|------------------------------------------|--------------|--------------|--------------|--------------|--------------|--------------|
| January                                  | 8.97         | 10.65        | 6.73         | 5.99         | 3.44         | 2.50         |
| February                                 | 8.69         | 9.38         | 5.22         | 4.85         | 1.69         | 1.39         |
| March                                    | 12.43        | 12.47        | 8.77         | 7.83         | 5.20         | 3.97         |
| April                                    | 16.22        | 16.94        | 13.00        | 14.49        | 10.55        | 9.89         |
| May                                      | 22.94        | 22.63        | 19.38        | 20.88        | 15.81        | 15.09        |
| June                                     | 25.59        | 26.88        | 22.08        | 24.83        | 18.92        | 18.73        |
| July                                     | 27.37        | 26.76        | 22.89        | 24.09        | 18.96        | 17.81        |
| August                                   | 28.67        | 28.69        | 24.12        | 27.05        | 21.72        | 20.17        |
| September                                | 25.81        | 26.64        | 21.51        | 23.02        | 18.92        | 17.68        |
| October                                  | 21.51        | 23.46        | 17.90        | 18.59        | 15.40        | 14.97        |
| November                                 | 15.13        | 16.69        | 12.89        | 12.66        | 10.23        | 9.35         |
| December                                 | 10.27        | 11.40        | 7.62         | 6.53         | 4.57         | 3.84         |
|                                          | 18.63        | 19.38        | 15.18        | 15.90        | 12.12        | 11.28        |
| <b>Indices</b>                           | <b>Pool1</b> | <b>Pool2</b> | <b>Pool3</b> | <b>Pool4</b> | <b>Pool5</b> | <b>Pool6</b> |
| average temperature coldest quarter (°C) | 9.31         | 10.48        | 6.52         | 5.79         | 3.23         | 2.58         |
| average temperature warmest quarter (°C) | 27.21        | 27.44        | 23.03        | 25.32        | 19.87        | 18.90        |
| max temperature of warmest month (°C)    | 53.28        | 49.80        | 42.59        | 53.55        | 42.59        | 40.35        |
| min temperature of coldest month (°C)    | 0.79         | 1.31         | -0.45        | -2.06        | -2.48        | -3.73        |
| average temperature coldest month (°C)   | 8.69         | 9.38         | 5.22         | 4.85         | 1.69         | 1.39         |
