# Supplementary material for: Adaptive differentiation coincides with local bioclimatic conditions along an elevational cline in populations of a lichen-forming fungus
Source: Springer Nature journal article supplement (doi:10.1186/s12862-017-0929-8), 2017-03-30

**Additional file 2.** Plot of the first two axes of a PCA showing high correlation between 19 bioclimatic variables and altitude for the six populations along the cline.

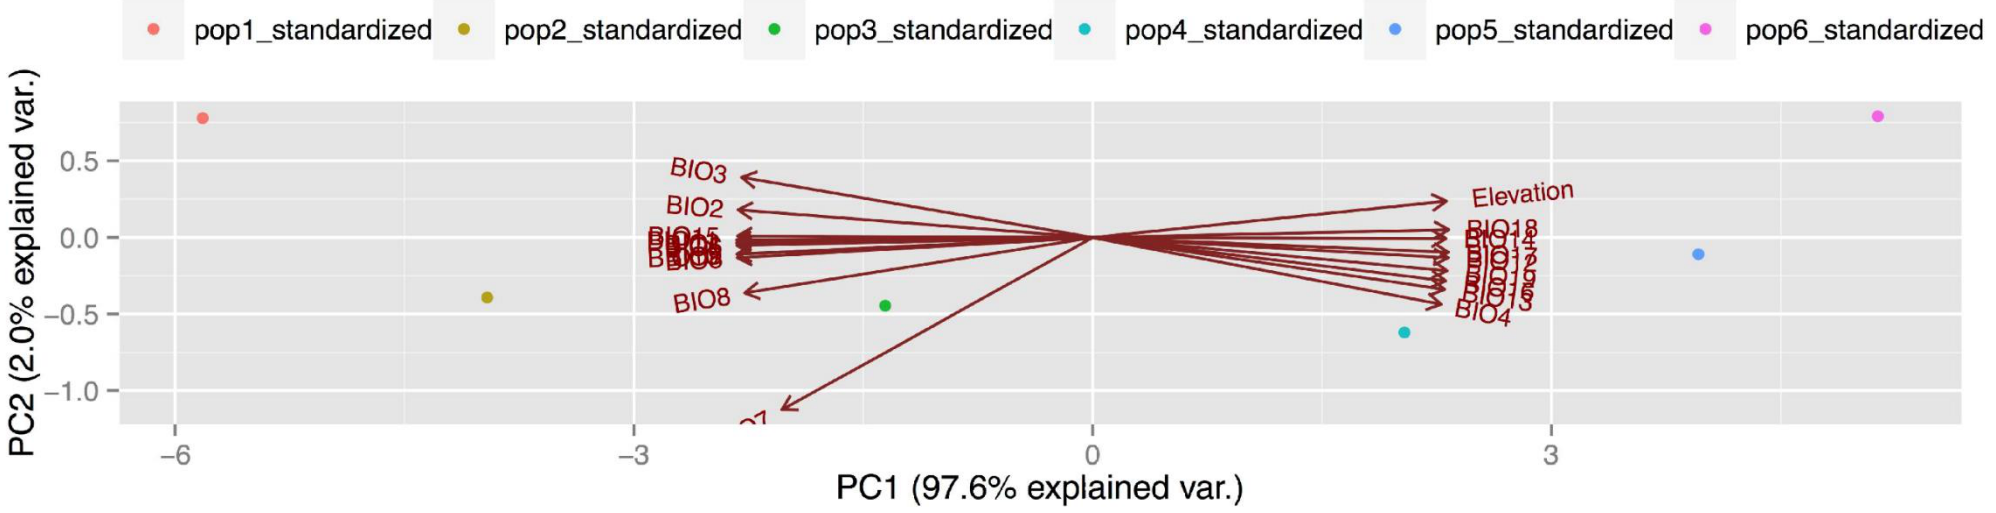

Supplement: MOESM2 [file 12862_2017_929_MOESM2_ESM.pdf]
