# Supplementary material for: Adaptive differentiation coincides with local bioclimatic conditions along an elevational cline in populations of a lichen-forming fungus
Source: Springer Nature journal article supplement (doi:10.1186/s12862-017-0929-8), 2017-03-30
Supplement: MOESM3 [file 12862_2017_929_MOESM3_ESM.pdf]

**Additional file 3.** Genetic characteristics of the six loci used to genotype 18 *L. pustulata* samples for anatomical and physiological measurements.

| Gene       | Primer             | Primer sequence                                    | Annotation                                   | Position (bp)* | Allele pops. 1 to 5 | Allele pop. 6 |
|------------|--------------------|----------------------------------------------------|----------------------------------------------|----------------|---------------------|---------------|
| LPUS_05581 | forward<br>reverse | CATCCAATTTGCGCGTAGTGTG<br>GAATCGCTGGTGGTCAGGTG     | Hsp90-like protein                           | 1775           | C                   | T             |
| LPUS_03073 | forward<br>reverse | GAAGTGGCAAACCCTCGATCG<br>CTATAGTCGGTTTGGCAAATCTTAC | polyketide synthase                          | 3081           | A                   | C             |
| LPUS_11054 | forward<br>reverse | ATCAAGGACCGTCGGCCTTTTG<br>CAGTGACAGCACCAATTGGCAC   | protein kinase C                             | 1581           | A                   | G             |
| LPUS_02974 | forward<br>reverse | CTTGGAAGCATATGGCTATTG<br>CTAGAGACTCTACCAAAGTGG     | thermotolerance protein                      | 683            | T                   | G             |
| LPUS_02744 | forward<br>reverse | GATCTGATCACTTACCTCGAC<br>CATGAGTCGTACTGAATTCATAG   | metallo-beta-lactamase<br>family protein     | 389            | T                   | C             |
| LPUS_03358 | forward<br>reverse | ATGCCCAACCGCCGATTC<br>CTTATTCACCTCGTTATGCACATGAC   | FAD-linked sulfhydryl<br>oxidase Alr protein | 246            | G                   | A             |

\* Positions in loci LPUS\_05581, LPUS\_03073 and LPUS\_11054 are 0.5% top  $F_{ST}$ -based SNPs and refer to coding sequence position. Positions in loci LPUS\_02974, LPUS\_02744, and LPUS\_03358 are top Z Bayenv2.0 SNPs and refer to coding sequence position.
