# Supplementary material for: Adaptive differentiation coincides with local bioclimatic conditions along an elevational cline in populations of a lichen-forming fungus
Source: Springer Nature journal article supplement (doi:10.1186/s12862-017-0929-8), 2017-03-30
Supplement: MOESM5 [file 12862_2017_929_MOESM5_ESM.pdf]

**Additional file 5.** a) The mean and standard deviation for three standard population genetic parameters,  $\pi$ , Watterson's  $\theta$  ( $\theta_W$ ), and Tajima's  $D$  in non-overlapping 10-kb windows across the genome of *L. pustulata*. b) Pairwise Tukey contrasts based on linear mixed effect models for each measure and population.

a)

| $\pi$ |             |             | <i>Tajima's D</i> |              |             |
|-------|-------------|-------------|-------------------|--------------|-------------|
|       | mean        | sd          | mean              | sd           |             |
| pop1  | 0.003751637 | 0.003492711 | pop1              | 0.154169039  | 0.829874561 |
| pop2  | 0.004406057 | 0.003354233 | pop2              | -0.839410129 | 0.712742622 |
| pop3  | 0.003681413 | 0.003369712 | pop3              | 0.049739133  | 0.925978082 |
| pop4  | 0.003592740 | 0.003333663 | pop4              | 0.198916837  | 0.967587202 |
| pop5  | 0.005505238 | 0.003858647 | pop5              | 1.111959530  | 0.539736077 |
| pop6  | 0.004120742 | 0.003494257 | pop6              | -0.260107058 | 0.321729979 |

*Watterson's  $\theta$*

|      | mean        | sd          |
|------|-------------|-------------|
| pop1 | 0.003547405 | 0.003332516 |
| pop2 | 0.005363743 | 0.003219011 |
| pop3 | 0.003575289 | 0.003324172 |
| pop4 | 0.003337400 | 0.003149108 |
| pop5 | 0.004387760 | 0.003662431 |
| pop6 | 0.004439896 | 0.003728312 |

b)

| $\pi$       | Estimate  | SE       | z       | P           |
|-------------|-----------|----------|---------|-------------|
| pop2 - pop1 | 5.40E-04  | 9.80E-05 | 5.514   | < 0.001 *** |
| pop3 - pop1 | -1.70E-04 | 9.05E-05 | -1.882  | 0.37178     |
| pop4 - pop1 | -3.17E-04 | 8.42E-05 | -3.760  | 0.00195 **  |
| pop5 - pop1 | 2.09E-03  | 1.71E-04 | 12.216  | < 0.001 *** |
| pop6 - pop1 | 5.27E-04  | 1.74E-04 | 3.034   | 0.02381 *   |
| pop3 - pop2 | -7.10E-04 | 1.17E-04 | -6.099  | < 0.001 *** |
| pop4 - pop2 | -8.57E-04 | 1.08E-04 | -7.963  | < 0.001 *** |
| pop5 - pop2 | 1.55E-03  | 1.91E-04 | 8.099   | < 0.001 *** |
| pop6 - pop2 | -1.34E-05 | 1.92E-04 | -0.070  | 1           |
| pop4 - pop3 | -1.46E-04 | 9.47E-05 | -1.544  | 0.59487     |
| pop5 - pop3 | 2.26E-03  | 1.63E-04 | 13.830  | < 0.001 *** |
| pop6 - pop3 | 6.97E-04  | 1.61E-04 | 4.320   | < 0.001 *** |
| pop5 - pop4 | 2.40E-03  | 1.78E-04 | 13.469  | < 0.001 *** |
| pop6 - pop4 | 8.43E-04  | 1.77E-04 | 4.760   | < 0.001 *** |
| pop6 - pop5 | -1.56E-03 | 8.16E-05 | -19.102 | < 0.001 *** |

*Watterson's  $\theta$* 

|             | Estimate  | SE       | z       | P           |
|-------------|-----------|----------|---------|-------------|
| pop2 - pop1 | 1.62E-03  | 8.53E-05 | 19.038  | < 0.001 *** |
| pop3 - pop1 | 1.95E-05  | 7.38E-05 | 0.264   | 0.99978     |
| pop4 - pop1 | -3.62E-04 | 7.62E-05 | -4.758  | < 0.001 *** |
| pop5 - pop1 | 1.08E-03  | 1.21E-04 | 8.955   | < 0.001 *** |
| pop6 - pop1 | 1.14E-03  | 1.32E-04 | 8.656   | < 0.001 *** |
| pop3 - pop2 | -1.60E-03 | 9.35E-05 | -17.155 | < 0.001 *** |
| pop4 - pop2 | -1.99E-03 | 8.31E-05 | -23.898 | < 0.001 *** |
| pop5 - pop2 | -5.42E-04 | 1.46E-04 | -3.700  | 0.00252 **  |
| pop6 - pop2 | -4.84E-04 | 1.56E-04 | -3.096  | 0.02013 *   |
| pop4 - pop3 | -3.82E-04 | 7.64E-05 | -5.000  | < 0.001 *** |
| pop5 - pop3 | 1.06E-03  | 1.16E-04 | 9.134   | < 0.001 *** |
| pop6 - pop3 | 1.12E-03  | 1.27E-04 | 8.836   | < 0.001 *** |
| pop5 - pop4 | 1.44E-03  | 1.33E-04 | 10.882  | < 0.001 *** |
| pop6 - pop4 | 1.50E-03  | 1.43E-04 | 10.496  | < 0.001 *** |
| pop6 - pop5 | 5.72E-05  | 7.29E-05 | 0.784   | 0.96445     |

*Tajima's D*

|             | Estimate | SE      | z       | P           |
|-------------|----------|---------|---------|-------------|
| pop2 - pop1 | -0.88785 | 0.04516 | -19.661 | < 1e-04 *** |
| pop3 - pop1 | -0.19458 | 0.04655 | -4.180  | 0.00038 *** |
| pop4 - pop1 | 0.03933  | 0.04486 | 0.877   | 0.94734     |
| pop5 - pop1 | 0.90731  | 0.03436 | 26.406  | < 1e-04 *** |
| pop6 - pop1 | -0.40573 | 0.03406 | -11.911 | < 1e-04 *** |
| pop3 - pop2 | 0.69326  | 0.05021 | 13.807  | < 1e-04 *** |
| pop4 - pop2 | 0.92718  | 0.0524  | 17.695  | < 1e-04 *** |
| pop5 - pop2 | 1.79516  | 0.04091 | 43.875  | < 1e-04 *** |
| pop6 - pop2 | 0.48212  | 0.03551 | 13.576  | < 1e-04 *** |
| pop4 - pop3 | 0.23391  | 0.04935 | 4.740   | < 1e-04 *** |
| pop5 - pop3 | 1.10189  | 0.041   | 26.875  | < 1e-04 *** |
| pop6 - pop3 | -0.21114 | 0.04172 | -5.061  | < 1e-04 *** |
| pop5 - pop4 | 0.86798  | 0.04223 | 20.555  | < 1e-04 *** |
| pop6 - pop4 | -0.44506 | 0.04257 | -10.455 | < 1e-04 *** |
| pop6 - pop5 | -1.31304 | 0.02206 | -59.527 | < 1e-04 *** |

Signif.codes: 0 '\*\*\*' 0.001 '\*\*' 0.01 '\*' 0.05 '.' 0.1 ' ' 1

*Note: Estimates for the mean pairwise difference deviate slightly from the difference between the real mean values. This is because the models incorporate a random structure that allows each population an independent slope across the scaffolds.*
