# Supplementary material for: Adaptive differentiation coincides with local bioclimatic conditions along an elevational cline in populations of a lichen-forming fungus
Source: Springer Nature journal article supplement (doi:10.1186/s12862-017-0929-8), 2017-03-30

**Additional file 6.** NJ trees of the correlation matrix obtained with Bayenv2.0 and the pairwise  $F_{ST}$  values.

Bayenv2.0

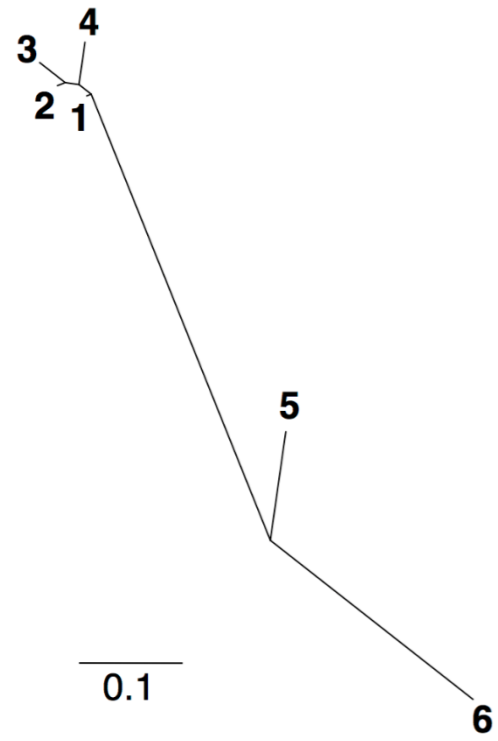

$F_{ST}$

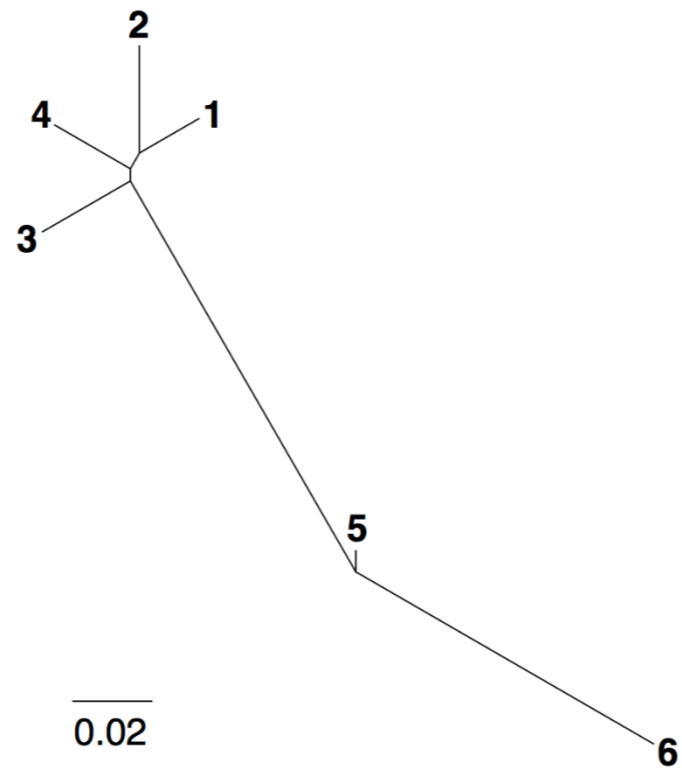

Supplement: MOESM6 [file 12862_2017_929_MOESM6_ESM.pdf]
