# Supplementary material for: Adaptive differentiation coincides with local bioclimatic conditions along an elevational cline in populations of a lichen-forming fungus
Source: Springer Nature journal article supplement (doi:10.1186/s12862-017-0929-8), 2017-03-30
Supplement: MOESM7 [file 12862_2017_929_MOESM7_ESM.pdf]

**Additional file 7.** Average pairwise  $F_{ST}$  (lower triangle) and pairwise correlations of Bayenv2.0 correlation matrix among allele frequencies (upper triangle).

|       | Pool1 | Pool2 | Pool3 | Pool4 | Pool5 | Pool6 |
|-------|-------|-------|-------|-------|-------|-------|
| Pool1 | -     | 0.960 | 0.938 | 0.966 | 0.599 | 0.230 |
| Pool2 | 0.045 | -     | 0.910 | 0.950 | 0.572 | 0.209 |
| Pool3 | 0.051 | 0.064 | -     | 0.942 | 0.578 | 0.225 |
| Pool4 | 0.044 | 0.055 | 0.050 | -     | 0.639 | 0.278 |
| Pool5 | 0.136 | 0.139 | 0.139 | 0.134 | -     | 0.854 |
| Pool6 | 0.230 | 0.236 | 0.225 | 0.231 | 0.082 | -     |
