# Supplementary material for: Adaptive differentiation coincides with local bioclimatic conditions along an elevational cline in populations of a lichen-forming fungus
Source: Springer Nature journal article supplement (doi:10.1186/s12862-017-0929-8), 2017-03-30
Supplement: MOESM8 [file 12862_2017_929_MOESM8_ESM.pdf]

**Additional file 8.** Three-(a) and four-(b) population test of the *L. pustulata* populations. The test was performed on 722,401 high confidence SNPs. Bold values indicate significant  $f3$  (if  $z < 0$ ) or  $f4$  statistics (if  $|z| < 3$ ).

a) threepop

| Population pairs      | $f3$ statistic    | Std. error         | $z$ -score      |
|-----------------------|-------------------|--------------------|-----------------|
| pop2-pop1,pop3        | 0.0173775         | 0.000636731        | 27.2918         |
| pop3-pop1,pop2        | 0.0219619         | 0.000666119        | 32.9699         |
| pop1-pop2,pop4        | 0.0077401         | 0.000438286        | 17.6599         |
| pop2-pop1,pop4        | 0.0162849         | 0.000581215        | 28.0187         |
| pop4-pop1,pop2        | 0.016254          | 0.000594484        | 27.3413         |
| pop1-pop2,pop5        | 0.0106111         | 0.00051858         | 20.4618         |
| pop2-pop1,pop5        | 0.0134139         | 0.000617673        | 21.7169         |
| pop5-pop1,pop2        | 0.086129          | 0.00145668         | 59.127          |
| pop2-pop1,pop6        | 0.0151955         | 0.000664185        | 22.8784         |
| pop6-pop1,pop2        | 0.180839          | 0.00255812         | 70.6922         |
| pop1-pop3,pop4        | 0.0120108         | 0.000491765        | 24.4238         |
| pop3-pop1,pop4        | 0.0165987         | 0.000586755        | 28.2889         |
| pop4-pop1,pop3        | 0.0119833         | 0.000471311        | 25.4255         |
| pop1-pop3,pop5        | 0.0129564         | 0.00056417         | 22.9654         |
| pop3-pop1,pop5        | 0.015653          | 0.000552825        | 28.3146         |
| pop5-pop1,pop3        | 0.0837838         | 0.00142035         | 58.9882         |
| pop1-pop3,pop6        | 0.0156229         | 0.00069885         | 22.3551         |
| pop3-pop1,pop6        | 0.0129865         | 0.00059892         | 21.6832         |
| pop6-pop1,pop3        | 0.174046          | 0.00251771         | 69.1286         |
| pop1-pop4,pop5        | 0.0124765         | 0.000497308        | 25.088          |
| pop4-pop1,pop5        | 0.0115176         | 0.000469425        | 24.5356         |
| pop5-pop1,pop4        | 0.0842637         | 0.00141382         | 59.5999         |
| pop1-pop4,pop6        | 0.0111959         | 0.000573403        | 19.5254         |
| pop4-pop1,pop6        | 0.0127982         | 0.000547682        | 23.3679         |
| pop6-pop1,pop4        | 0.178472          | 0.00254889         | 70.0196         |
| pop1-pop5,pop6        | 0.118825          | 0.00188847         | 62.921          |
| <b>pop5-pop1,pop6</b> | <b>-0.0220845</b> | <b>0.000641762</b> | <b>-34.4123</b> |
| pop6-pop1,pop5        | 0.0708437         | 0.000983307        | 72.0464         |
| pop2-pop3,pop4        | 0.0216482         | 0.000816396        | 26.5167         |
| pop3-pop2,pop4        | 0.0176912         | 0.000650505        | 27.1962         |
| pop4-pop2,pop3        | 0.0108907         | 0.000511801        | 21.2792         |
| pop2-pop3,pop5        | 0.0197228         | 0.000841837        | 23.4282         |
| pop3-pop2,pop5        | 0.0196166         | 0.000692171        | 28.3407         |
| pop5-pop2,pop3        | 0.0798202         | 0.00138885         | 57.4723         |
| pop2-pop3,pop6        | 0.0241708         | 0.000919722        | 26.2806         |
| pop3-pop2,pop6        | 0.0151686         | 0.000765618        | 19.8122         |
| pop6-pop2,pop3        | 0.171863          | 0.00248627         | 69.1251         |
| pop2-pop4,pop5        | 0.0181503         | 0.00074528         | 24.3536         |
| pop4-pop2,pop5        | 0.0143886         | 0.000614642        | 23.4097         |
| pop5-pop2,pop4        | 0.0813927         | 0.00139318         | 58.4222         |
| pop2-pop4,pop6        | 0.0186513         | 0.000820023        | 22.7448         |
| pop4-pop2,pop6        | 0.0138876         | 0.000725204        | 19.15           |

| Population pairs      | <i>f3</i> statistic | Std. error         | z-score         |
|-----------------------|---------------------|--------------------|-----------------|
| pop6-pop2,pop4        | 0.177383            | 0.00251119         | 70.637          |
| pop2-pop5,pop6        | 0.123409            | 0.00194466         | 63.4606         |
| <b>pop5-pop2,pop6</b> | <b>-0.0238661</b>   | <b>0.000645081</b> | <b>-36.997</b>  |
| pop6-pop2,pop5        | 0.0726253           | 0.000988204        | 73.4922         |
| pop3-pop4,pop5        | 0.0161187           | 0.000578704        | 27.8532         |
| pop4-pop3,pop5        | 0.0124632           | 0.000572428        | 21.7726         |
| pop5-pop3,pop4        | 0.0833181           | 0.00139937         | 59.5395         |
| pop3-pop4,pop6        | 0.0121717           | 0.000612925        | 19.8584         |
| pop4-pop3,pop6        | 0.0164103           | 0.000707956        | 23.1798         |
| pop6-pop3,pop4        | 0.17486             | 0.00251857         | 69.4286         |
| pop3-pop5,pop6        | 0.118855            | 0.00185244         | 64.1613         |
| <b>pop5-pop3,pop6</b> | <b>-0.019418</b>    | <b>0.000651205</b> | <b>-29.8186</b> |
| pop6-pop3,pop5        | 0.0681772           | 0.000961074        | 70.9386         |
| <b>pop5-pop4,pop6</b> | <b>-0.0233651</b>   | <b>0.000653936</b> | <b>-35.7299</b> |
| pop6-pop4,pop5        | 0.0721243           | 0.00097807         | 73.7415         |

b) fourpop

| Population pairs                   | <i>f4</i> statistic | Std. error         | z-score          |
|------------------------------------|---------------------|--------------------|------------------|
| <b>(pop1-pop2) vs. (pop3-pop4)</b> | <b>0.00109258</b>   | <b>0.000412011</b> | <b>2.65183</b>   |
| (pop1-pop3) vs. (pop2-pop4)        | 0.00536324          | 0.000531731        | 10.0864          |
| (pop1-pop4) vs. (pop2-pop3)        | 0.00427065          | 0.000554483        | 7.70205          |
| (pop1-pop2) vs. (pop3-pop5)        | 0.00396359          | 0.000547318        | 7.24184          |
| (pop1-pop3) vs. (pop2-pop5)        | 0.00630886          | 0.000624146        | 10.108           |
| (pop1-pop5) vs. (pop2-pop3)        | 0.00234527          | 0.000701747        | 3.34204          |
| (pop1-pop2) vs. (pop3-pop6)        | 0.00218204          | 0.000655148        | 3.33061          |
| (pop1-pop3) vs. (pop2-pop6)        | 0.00897538          | 0.00076377         | 11.7514          |
| (pop1-pop6) vs. (pop2-pop3)        | 0.00679333          | 0.000845915        | 8.03076          |
| (pop1-pop2) vs. (pop4-pop5)        | 0.00287101          | 0.000477792        | 6.00891          |
| (pop1-pop4) vs. (pop2-pop5)        | 0.00473637          | 0.000511838        | 9.25365          |
| (pop1-pop5) vs. (pop2-pop4)        | 0.00186536          | 0.000563857        | 3.30821          |
| <b>(pop1-pop2) vs. (pop4-pop6)</b> | <b>0.00108946</b>   | <b>0.00060498</b>  | <b>1.80081</b>   |
| (pop1-pop4) vs. (pop2-pop6)        | 0.00345581          | 0.000620346        | 5.57078          |
| (pop1-pop6) vs. (pop2-pop4)        | 0.00236635          | 0.000691664        | 3.42125          |
| (pop1-pop2) vs. (pop5-pop6)        | -0.00178155         | 0.000354755        | -5.02193         |
| (pop1-pop5) vs. (pop2-pop6)        | 0.108214            | 0.00184589         | 58.6242          |
| (pop1-pop6) vs. (pop2-pop5)        | 0.109995            | 0.00181925         | 60.4619          |
| <b>(pop1-pop3) vs. (pop4-pop5)</b> | <b>0.00094562</b>   | <b>0.000566741</b> | <b>1.66852</b>   |
| <b>(pop1-pop4) vs. (pop3-pop5)</b> | <b>0.000465714</b>  | <b>0.000496</b>    | <b>0.938938</b>  |
| <b>(pop1-pop5) vs. (pop3-pop4)</b> | <b>-0.000479907</b> | <b>0.000548285</b> | <b>-0.875287</b> |
| (pop1-pop3) vs. (pop4-pop6)        | 0.00361214          | 0.000714493        | 5.05553          |
| <b>(pop1-pop4) vs. (pop3-pop6)</b> | <b>-0.000814842</b> | <b>0.000583135</b> | <b>-1.39735</b>  |
| (pop1-pop6) vs. (pop3-pop4)        | -0.00442698         | 0.000688982        | -6.42539         |
| (pop1-pop3) vs. (pop5-pop6)        | 0.00266652          | 0.0003691          | 7.22437          |
| (pop1-pop5) vs. (pop3-pop6)        | 0.105868            | 0.00179605         | 58.9451          |

| <b>Population pairs</b>            | <b><i>f</i><sup>4</sup> statistic</b> | <b>Std. error</b>  | <b>z-score</b>  |
|------------------------------------|---------------------------------------|--------------------|-----------------|
| (pop1-pop6) vs. (pop3-pop5)        | 0.103202                              | 0.00180108         | 57.2999         |
| (pop1-pop4) vs. (pop5-pop6)        | -0.00128056                           | 0.000357602        | -3.58096        |
| (pop1-pop5) vs. (pop4-pop6)        | 0.106348                              | 0.00180608         | 58.8834         |
| (pop1-pop6) vs. (pop4-pop5)        | 0.107629                              | 0.00181726         | 59.2259         |
| <b>(pop2-pop3) vs. (pop4-pop5)</b> | <b>-0.00192539</b>                    | <b>0.000708844</b> | <b>-2.71624</b> |
| (pop2-pop4) vs. (pop3-pop5)        | -0.00349788                           | 0.000617453        | -5.66502        |
| <b>(pop2-pop5) vs. (pop3-pop4)</b> | <b>-0.00157249</b>                    | <b>0.00058333</b>  | <b>-2.69571</b> |
| <b>(pop2-pop3) vs. (pop4-pop6)</b> | <b>0.00252268</b>                     | <b>0.000868248</b> | <b>2.90548</b>  |
| (pop2-pop4) vs. (pop3-pop6)        | -0.00299688                           | 0.000741656        | -4.0408         |
| (pop2-pop6) vs. (pop3-pop4)        | -0.00551956                           | 0.000713615        | -7.73465        |
| (pop2-pop3) vs. (pop5-pop6)        | 0.00444807                            | 0.000437333        | 10.1709         |
| (pop2-pop5) vs. (pop3-pop6)        | 0.103686                              | 0.00176235         | 58.834          |
| (pop2-pop6) vs. (pop3-pop5)        | 0.0992382                             | 0.00178283         | 55.6632         |
| <b>(pop2-pop4) vs. (pop5-pop6)</b> | <b>0.000500995</b>                    | <b>0.000424606</b> | <b>1.17991</b>  |
| (pop2-pop5) vs. (pop4-pop6)        | 0.105259                              | 0.00177071         | 59.4445         |
| (pop2-pop6) vs. (pop4-pop5)        | 0.104758                              | 0.00180329         | 58.0924         |
| (pop3-pop4) vs. (pop5-pop6)        | -0.00394707                           | 0.000361426        | -10.9208        |
| (pop3-pop5) vs. (pop4-pop6)        | 0.102736                              | 0.00179269         | 57.3084         |
| (pop3-pop6) vs. (pop4-pop5)        | 0.106683                              | 0.00178986         | 59.6043         |
