# Supplementary material for: Adaptive differentiation coincides with local bioclimatic conditions along an elevational cline in populations of a lichen-forming fungus
Source: Springer Nature journal article supplement (doi:10.1186/s12862-017-0929-8), 2017-03-30
Supplement: MOESM9 [file 12862_2017_929_MOESM9_ESM.pdf]

**Additional file 9.** Parameter estimates from MIGRATE-N based on 49 loci for pairs of three genetic groups of *L. pustulata* found along the altitudinal gradient (A: populations 1 to 4, B: population 5; C: population 6).

| <b>Parameter</b> | <b>2.5%</b> | <b>25%</b> | <b>75%</b> | <b>97.5%</b> | <b>Median</b> | <b>Mean</b> |
|------------------|-------------|------------|------------|--------------|---------------|-------------|
| Theta A          | 0.059       | 0.060      | 0.063      | 0.066        | 0.061         | 0.054       |
| Theta B          | 0.060       | 0.063      | 0.066      | 0.068        | 0.065         | 0.065       |
| Theta C          | 0.047       | 0.052      | 0.056      | 0.058        | 0.054         | 0.057       |
| Theta 1*M B->A   | 0.000       | 0.600      | 10.200     | 19.800       | 9.300         | 5.570       |
| Theta 2*M C->A   | 0.000       | 0.000      | 7.800      | 16.800       | 8.100         | 2.269       |
| Theta 3*M A->B   | 351.000     | 384.600    | 411.600    | 439.200      | 397.500       | 395.394     |
| Theta 4*M C>B    | 234.000     | 249.000    | 266.400    | 289.200      | 260.700       | 293.705     |
| Theta 5*M A>C    | 0.000       | 1.200      | 12.000     | 22.200       | 10.500        | 6.756       |
| Theta 6*M B>C    | 0.000       | 3.600      | 15.600     | 24.600       | 12.300        | 9.927       |
