# Supplementary material for: Adaptive differentiation coincides with local bioclimatic conditions along an elevational cline in populations of a lichen-forming fungus
Source: Springer Nature journal article supplement (doi:10.1186/s12862-017-0929-8), 2017-03-30
Supplement: MOESM10 [file 12862_2017_929_MOESM10_ESM.pdf]

**Additional file 10.** Allele frequency and annotation for the 42 environmentally associated (top Z Bayenv2.0 score) and highly differentiated (top 0.5%  $F_{ST}$  distribution) SNPs.

| Gene name  | SNP position | Reference allele | Pool 1        | Pool 2        | Pool 3        | Pool 4        | Pool 5        | Pool 6       | Annotation                                         |
|------------|--------------|------------------|---------------|---------------|---------------|---------------|---------------|--------------|----------------------------------------------------|
| LPUS_06124 | 1376         | C                | 0:21:9:0:0:0  | 0:3:27:0:0:0  | 0:26:4:0:0:0  | 0:0:30:0:0:0  | 0:19:11:0:0:0 | 0:30:0:0:0:0 | rRNA processing protein Nop9                       |
| LPUS_07657 | 3527         | G                | 16:0:0:14:0:0 | 30:0:0:0:0:0  | 3:0:0:27:0:0  | 0:0:0:30:0:0  | 0:0:0:30:0:0  | 0:0:0:30:0:0 | glutamate carboxypeptidase II                      |
| LPUS_06827 | 948          | G                | 24:0:0:6:0:0  | 4:0:0:26:0:0  | 16:0:0:14:0:0 | 0:0:0:30:0:0  | 17:0:0:13:0:0 | 30:0:0:0:0:0 | flap endonuclease 1                                |
| LPUS_04288 | 761          | G                | 20:0:0:10:0:0 | 16:0:0:14:0:0 | 20:0:0:10:0:0 | 0:0:0:30:0:0  | 21:0:0:9:0:0  | 30:0:0:0:0:0 |                                                    |
| LPUS_07610 | 3404         | A                | 30:0:0:0:0:0  | 22:0:0:8:0:0  | 10:0:0:20:0:0 | 12:0:0:18:0:0 | 9:0:0:21:0:0  | 0:0:0:30:0:0 |                                                    |
| LPUS_06021 | 2351         | A                | 12:0:0:18:0:0 | 12:0:0:18:0:0 | 13:0:0:17:0:0 | 30:0:0:0:0:0  | 13:0:0:17:0:0 | 0:0:0:30:0:0 | vacuolar protein sorting protein                   |
| LPUS_03230 | 109          | A                | 30:0:0:0:0:0  | 2:0:0:28:0:0  | 19:0:0:11:0:0 | 1:0:0:29:0:0  | 0:0:0:30:0:0  | 0:0:0:30:0:0 | reverse transcriptase domain protein               |
| LPUS_05016 | 142          | A                | 16:0:0:14:0:0 | 0:0:0:30:0:0  | 27:0:0:3:0:0  | 30:0:0:0:0:0  | 30:0:0:0:0:0  | 25:0:0:5:0:0 | Wsc-domain containing protein                      |
| LPUS_06496 | 4656         | T                | 0:9:21:0:0:0  | 0:0:30:0:0:0  | 0:17:13:0:0:0 | 0:30:0:0:0:0  | 0:13:17:0:0:0 | 0:0:30:0:0:0 | helicase swr1                                      |
| LPUS_04302 | 417          | A                | 20:0:10:0:0:0 | 17:0:13:0:0:0 | 6:0:24:0:0:0  | 0:0:30:0:0:0  | 15:0:15:0:0:0 | 30:0:0:0:0:0 | UV damage endonuclease                             |
| LPUS_04302 | 442          | A                | 20:10:0:0:0:0 | 14:16:0:0:0:0 | 3:27:0:0:0:0  | 0:30:0:0:0:0  | 18:12:0:0:0:0 | 30:0:0:0:0:0 |                                                    |
| LPUS_03358 | 246          | G                | 0:0:0:30:0:0  | 12:0:0:18:0:0 | 0:0:0:30:0:0  | 13:0:0:17:0:0 | 7:0:0:23:0:0  | 30:0:0:0:0:0 | fad-linked sulfhydryl oxidase Alr protein          |
| LPUS_10824 | 710          | G                | 0:0:0:30:0:0  | 3:0:0:27:0:0  | 2:0:0:28:0:0  | 23:0:0:7:0:0  | 17:0:0:13:0:0 | 30:0:0:0:0:0 |                                                    |
| LPUS_09622 | 443          | G                | 0:0:0:30:0:0  | 0:0:14:16:0:0 | 0:0:18:12:0:0 | 0:0:20:10:0:0 | 0:0:17:13:0:0 | 0:0:30:0:0:0 |                                                    |
| LPUS_09622 | 902          | C                | 0:0:30:0:0:0  | 17:0:13:0:0:0 | 19:0:11:0:0:0 | 25:0:5:0:0:0  | 16:0:14:0:0:0 | 30:0:0:0:0:0 | protein kinase                                     |
| LPUS_09622 | 1200         | A                | 30:0:0:0:0:0  | 10:0:20:0:0:0 | 12:0:18:0:0:0 | 6:0:24:0:0:0  | 11:0:19:0:0:0 | 0:0:30:0:0:0 |                                                    |
| LPUS_09622 | 1290         | A                | 30:0:0:0:0:0  | 7:0:0:23:0:0  | 10:0:0:20:0:0 | 8:0:0:22:0:0  | 13:0:0:17:0:0 | 0:0:0:30:0:0 |                                                    |
| LPUS_02236 | 4121         | C                | 0:12:18:0:0:0 | 0:14:16:0:0:0 | 0:20:10:0:0:0 | 0:30:0:0:0:0  | 0:11:19:0:0:0 | 0:0:30:0:0:0 | 90S preribosome SSU processome component Krr1      |
| LPUS_02970 | 980          | A                | 30:0:0:0:0:0  | 16:0:14:0:0:0 | 22:0:8:0:0:0  | 15:0:15:0:0:0 | 9:0:21:0:0:0  | 0:0:30:0:0:0 |                                                    |
| LPUS_02974 | 683          | T                | 0:30:0:0:0:0  | 1:19:0:10:0:0 | 1:24:0:5:0:0  | 0:20:0:10:0:0 | 0:9:0:21:0:0  | 0:0:0:30:0:0 | thermotolerance protein                            |
| LPUS_01916 | 2259         | C                | 1:0:18:11:0:0 | 0:0:26:4:0:0  | 9:0:15:6:0:0  | 0:0:30:0:0:0  | 0:0:12:18:0:0 | 0:0:0:30:0:0 | septin                                             |
| LPUS_07111 | 1299         | A                | 5:0:0:25:0:0  | 16:0:0:14:0:0 | 12:0:0:18:0:0 | 30:0:0:0:0:0  | 10:0:0:20:0:0 | 0:0:0:30:0:0 |                                                    |
| LPUS_05969 | 250          | A                | 30:0:0:0:0:0  | 27:0:0:3:0:0  | 29:0:0:1:0:0  | 17:0:0:13:0:0 | 16:0:0:14:0:0 | 0:0:0:30:0:0 |                                                    |
| LPUS_04289 | 839          | A                | 15:0:0:15:0:0 | 10:0:0:20:0:0 | 12:0:0:18:0:0 | 30:0:0:0:0:0  | 12:0:0:18:0:0 | 0:0:0:30:0:0 | Hsp20_like chaperone                               |
| LPUS_02732 | 179          | T                | 0:7:23:0:0:0  | 0:18:12:0:0:0 | 0:17:13:0:0:0 | 0:30:0:0:0:0  | 0:13:17:0:0:0 | 0:0:30:0:0:0 | phosphopantothienoylcysteine decarboxylase protein |
| LPUS_04375 | 216          | T                | 0:27:3:0:0:0  | 0:30:0:0:0:0  | 0:4:26:0:0:0  | 0:3:27:0:0:0  | 0:0:30:0:0:0  | 0:0:30:0:0:0 | flavin-binding monooxygenase                       |
| LPUS_07509 | 2843         | G                | 0:0:0:30:0:0  | 4:0:0:26:0:0  | 22:0:0:8:0:0  | 10:0:0:20:0:0 | 23:0:0:7:0:0  | 30:0:0:0:0:0 | calcium channel subunit Cch1                       |
