# Supplementary material for: Adaptive differentiation coincides with local bioclimatic conditions along an elevational cline in populations of a lichen-forming fungus
Source: Springer Nature journal article supplement (doi:10.1186/s12862-017-0929-8), 2017-03-30
Supplement: MOESM11 [file 12862_2017_929_MOESM11_ESM.pdf]

**Additional file 11.** GO enriched categories for a) top 0.5% highly differentiated SNPs, b) top 0.5% highly differentiated SNPs differentially fixed between populations 1-4 and population 6.

a)

| <b>term ID</b> | <b>description</b>                                | <b>frequency</b> | <b>log10 p-value</b> |
|----------------|---------------------------------------------------|------------------|----------------------|
| GO:0051179     | localization                                      | 17.86%           | -1.4177              |
| GO:0010467     | gene expression                                   | 16.70%           | -2.2774              |
| GO:0016070     | RNA metabolic process                             | 13.71%           | -1.5186              |
| GO:0019538     | protein metabolic process                         | 12.33%           | -1.511               |
| GO:0007154     | cell communication                                | 4.36%            | -1.6099              |
| GO:0006812     | cation transport                                  | 3.98%            | -3.3979              |
| GO:0023052     | signaling                                         | 3.84%            | -1.5547              |
| GO:0006508     | proteolysis                                       | 3.71%            | -2.2269              |
| GO:0006396     | RNA processing                                    | 2.78%            | -1.5196              |
| GO:0008610     | lipid biosynthetic process                        | 2.21%            | -2.7852              |
| GO:0006310     | DNA recombination                                 | 1.84%            | -1.7484              |
| GO:0009057     | macromolecule catabolic process                   | 1.64%            | -1.5659              |
| GO:0051641     | cellular localization                             | 1.64%            | -1.4074              |
| GO:0008643     | carbohydrate transport                            | 1.47%            | -3.8861              |
| GO:0051301     | cell division                                     | 1.36%            | -1.6692              |
| GO:0048519     | negative regulation of biological process         | 1.24%            | -2.062               |
| GO:0006022     | aminoglycan metabolic process                     | 1.10%            | -1.769               |
| GO:0042254     | ribosome biogenesis                               | 1.03%            | -1.9531              |
| GO:0016072     | rRNA metabolic process                            | 0.76%            | -1.4634              |
| GO:0006023     | aminoglycan biosynthetic process                  | 0.73%            | -1.4852              |
| GO:0022402     | cell cycle process                                | 0.53%            | -2.1463              |
| GO:0009311     | oligosaccharide metabolic process                 | 0.51%            | -1.4671              |
| GO:0016071     | mRNA metabolic process                            | 0.49%            | -1.6899              |
| GO:0006928     | cellular component movement                       | 0.49%            | -1.4689              |
| GO:0007059     | chromosome segregation                            | 0.37%            | -1.6189              |
| GO:0009894     | regulation of catabolic process                   | 0.28%            | -1.7404              |
| GO:0006413     | translational initiation                          | 0.27%            | -1.4244              |
| GO:0031329     | regulation of cellular catabolic process          | 0.26%            | -1.4595              |
| GO:1901701     | cellular response to oxygen-containing compound   | 0.23%            | -2.8794              |
| GO:0000003     | reproduction                                      | 0.21%            | -2.7799              |
| GO:0007017     | microtubule-based process                         | 0.17%            | -1.8159              |
| GO:0052646     | alditol phosphate metabolic process               | 0.15%            | -1.3021              |
| GO:0006072     | glycerol-3-phosphate metabolic process            | 0.14%            | -1.3021              |
| GO:0000272     | polysaccharide catabolic process                  | 0.14%            | -2.3063              |
| GO:0019954     | asexual reproduction                              | 0.14%            | -1.8404              |
| GO:0006298     | mismatch repair                                   | 0.14%            | -3.0862              |
| GO:1901071     | glucosamine-containing compound metabolic process | 0.13%            | -2.0878              |
| GO:0016567     | protein ubiquitination                            | 0.11%            | -1.5885              |
| GO:0010876     | lipid localization                                | 0.10%            | -1.4618              |
| GO:0040007     | growth                                            | 0.08%            | -2.0357              |
| GO:0003006     | developmental process involved in reproduction    | 0.08%            | -2.2874              |
| GO:0000280     | nuclear division                                  | 0.06%            | -1.7701              |

| <b>term_ID</b> | <b>description</b>                                          | <b>frequency</b> | <b>log10 p-value</b> |
|----------------|-------------------------------------------------------------|------------------|----------------------|
| GO:0006816     | calcium ion transport                                       | 0.05%            | -1.5516              |
| GO:0005992     | trehalose biosynthetic process                              | 0.05%            | -2.1707              |
| GO:0010565     | regulation of cellular ketone metabolic process             | 0.04%            | -1.4852              |
| GO:0051235     | maintenance of location                                     | 0.03%            | -2.1643              |
| GO:0006888     | ER to Golgi vesicle-mediated transport                      | 0.02%            | -2.0878              |
| GO:0015914     | phospholipid transport                                      | 0.02%            | -1.7364              |
| GO:0032507     | maintenance of protein location in cell                     | 0.02%            | -1.8196              |
| GO:0006271     | DNA strand elongation involved in DNA replication           | 0.01%            | -1.4852              |
| GO:0022616     | DNA strand elongation                                       | 0.01%            | -1.4852              |
| GO:0006487     | protein N-linked glycosylation                              | 0.01%            | -2.3063              |
| GO:0018022     | peptidyl-lysine methylation                                 | 0.00%            | -1.3021              |
| GO:0030433     | ER-associated ubiquitin-dependent protein catabolic process | 0.00%            | -1.7364              |
| GO:0030447     | filamentous growth                                          | 0.00%            | -1.5596              |
| GO:0042762     | regulation of sulfur metabolic process                      | 0.00%            | -1.9248              |
| GO:0034248     | regulation of cellular amide metabolic process              | 0.00%            | -1.5516              |
| GO:0042318     | penicillin biosynthetic process                             | 0.00%            | -2.1707              |
| GO:1900549     | N';N";N"'-triacylfusarinine C metabolic process             | 0.00%            | -1.7364              |
| GO:1900551     | N';N";N"'-triacylfusarinine C biosynthetic process          | 0.00%            | -1.7364              |
| GO:0051278     | fungal-type cell wall polysaccharide biosynthetic process   | 0.00%            | -2.1707              |
| GO:0036184     | asperthecin biosynthetic process                            | 0.00%            | -1.3021              |

b)

| <b>term_ID</b> | <b>description</b>                                       | <b>frequency</b> | <b>log10 p-value</b> |
|----------------|----------------------------------------------------------|------------------|----------------------|
| GO:0010467     | gene expression                                          | 16.70%           | -1.6542              |
| GO:0019538     | protein metabolic process                                | 12.33%           | -1.7167              |
| GO:0031326     | regulation of cellular biosynthetic process              | 9.00%            | -2.4962              |
| GO:0044248     | cellular catabolic process                               | 7.95%            | -1.3343              |
| GO:0006412     | translation                                              | 4.70%            | -1.3155              |
| GO:0006396     | RNA processing                                           | 2.78%            | -2.0969              |
| GO:0008643     | carbohydrate transport                                   | 1.47%            | -3.8539              |
| GO:0005976     | polysaccharide metabolic process                         | 1.08%            | -1.9169              |
| GO:0042254     | ribosome biogenesis                                      | 1.03%            | -2.1226              |
| GO:0016071     | mRNA metabolic process                                   | 0.49%            | -1.7849              |
| GO:0006928     | cellular component movement                              | 0.49%            | -1.6946              |
| GO:0052803     | imidazole-containing compound metabolic process          | 0.46%            | -1.5038              |
| GO:0006547     | histidine metabolic process                              | 0.45%            | -1.5038              |
| GO:0090502     | RNA phosphodiester bond hydrolysis; endonucleolytic      | 0.42%            | -1.4405              |
| GO:0006397     | mRNA processing                                          | 0.37%            | -1.547               |
| GO:0009628     | response to abiotic stimulus                             | 0.31%            | -1.5632              |
| GO:1901700     | response to oxygen-containing compound                   | 0.31%            | -1.5117              |
| GO:0000272     | polysaccharide catabolic process                         | 0.14%            | -1.7897              |
| GO:0019954     | asexual reproduction                                     | 0.14%            | -2.0921              |
| GO:0006298     | mismatch repair                                          | 0.14%            | -2.7852              |
| GO:0006112     | energy reserve metabolic process                         | 0.13%            | -1.326               |
| GO:0048646     | anatomical structure formation involved in morphogenesis | 0.13%            | -2.4609              |
| GO:0022414     | reproductive process                                     | 0.12%            | -1.4034              |

| <b>term ID</b> | <b>description</b>                                      | <b>frequency</b> | <b>log10 p-value</b> |
|----------------|---------------------------------------------------------|------------------|----------------------|
| GO:0051056     | regulation of small GTPase mediated signal transduction | 0.11%            | -1.534               |
| GO:0016567     | protein ubiquitination                                  | 0.11%            | -2.0737              |
| GO:0046854     | phosphatidylinositol phosphorylation                    | 0.11%            | -2.585               |
| GO:0040007     | growth                                                  | 0.08%            | -1.6003              |
| GO:1903047     | mitotic cell cycle process                              | 0.08%            | -2.9957              |
| GO:0044703     | multi-organism reproductive process                     | 0.07%            | -1.7724              |
| GO:0005992     | trehalose biosynthetic process                          | 0.05%            | -3.2757              |
| GO:0016049     | cell growth                                             | 0.04%            | -1.6112              |
| GO:0006888     | ER to Golgi vesicle-mediated transport                  | 0.02%            | -2.9245              |
| GO:0006487     | protein N-linked glycosylation                          | 0.01%            | -2.6655              |
| GO:0030010     | establishment of cell polarity                          | 0.01%            | -2.15                |
| GO:0051784     | negative regulation of nuclear division                 | 0.01%            | -2.1284              |
| GO:0071852     | fungus-type cell wall organization or biogenesis        | 0.00%            | -1.534               |
| GO:0033244     | regulation of penicillin metabolic process              | 0.00%            | -2.6198              |
| GO:0045460     | sterigmatocystin metabolic process                      | 0.00%            | -1.326               |
