# Supplementary material for: Adaptive differentiation coincides with local bioclimatic conditions along an elevational cline in populations of a lichen-forming fungus
Source: Springer Nature journal article supplement (doi:10.1186/s12862-017-0929-8), 2017-03-30
Supplement: MOESM12 [file 12862_2017_929_MOESM12_ESM.pdf]

**Additional file 12.** List of significantly enriched GO terms for environmentally associated genes. Gene names in bold indicate genes containing top Z Bayenv2.0 SNPs.

GO:0051179 **LPUS\_01293** **LPUS\_01915** LPUS\_01919 LPUS\_02074 **LPUS\_02677** **LPUS\_02740** LPUS\_02742  
**LPUS\_02791** **LPUS\_02935** **LPUS\_02976** **LPUS\_03023** **LPUS\_03026** **LPUS\_03459** LPUS\_03487  
LPUS\_03659 LPUS\_03694 LPUS\_03949 LPUS\_04000 **LPUS\_04075** LPUS\_04231 LPUS\_04290  
**LPUS\_04297** **LPUS\_04453** LPUS\_04648 **LPUS\_04828** LPUS\_04839 **LPUS\_04846** **LPUS\_05003**  
**LPUS\_05015** **LPUS\_05017** **LPUS\_05036** LPUS\_05069 LPUS\_05078 **LPUS\_05092** LPUS\_05119  
LPUS\_05242 **LPUS\_05296** **LPUS\_05319** **LPUS\_05476** **LPUS\_05516** **LPUS\_05533** LPUS\_05535  
LPUS\_05940 **LPUS\_05963** **LPUS\_06021** LPUS\_06047 **LPUS\_06065** **LPUS\_06114** **LPUS\_06132**  
LPUS\_06203 LPUS\_06473 LPUS\_06672 LPUS\_06695 **LPUS\_06700** **LPUS\_06704** **LPUS\_06705**  
**LPUS\_06743** **LPUS\_06784** **LPUS\_06790** **LPUS\_06796** **LPUS\_06822** **LPUS\_06834** **LPUS\_06881**  
**LPUS\_07109** **LPUS\_07110** **LPUS\_07153** LPUS\_07228 LPUS\_07296 **LPUS\_07352** **LPUS\_07452**  
**LPUS\_07509** **LPUS\_07552** LPUS\_07557 **LPUS\_07869** **LPUS\_08258** LPUS\_08418 **LPUS\_08548**  
**LPUS\_08926** **LPUS\_08962** **LPUS\_08979** **LPUS\_09309** **LPUS\_09381** **LPUS\_09390** LPUS\_09393  
LPUS\_09425 LPUS\_09481 **LPUS\_09512** LPUS\_09615 LPUS\_10298 **LPUS\_10369** LPUS\_10396  
LPUS\_10446 LPUS\_10455 **LPUS\_10568** LPUS\_10613 **LPUS\_10830** LPUS\_10831 **LPUS\_11004**  
**LPUS\_11287** **LPUS\_11315** **LPUS\_11330** LPUS\_11605 **LPUS\_11674** LPUS\_11864 LPUS\_12375

GO:0007154 LPUS\_01993 **LPUS\_02512** **LPUS\_02733** **LPUS\_02812** LPUS\_02975 LPUS\_02987 LPUS\_03198  
**LPUS\_03892** **LPUS\_04075** **LPUS\_04828** LPUS\_05288 LPUS\_05662 LPUS\_06047 **LPUS\_06504**  
**LPUS\_06582** LPUS\_06672 **LPUS\_06699** **LPUS\_06811** **LPUS\_07254** LPUS\_07354 **LPUS\_07508**  
**LPUS\_08926** **LPUS\_09246** LPUS\_09385 LPUS\_09663 LPUS\_10835

GO:0007165 LPUS\_01993 **LPUS\_02512** **LPUS\_02733** LPUS\_02975 LPUS\_02987 LPUS\_03198 **LPUS\_03892**  
**LPUS\_04075** **LPUS\_04828** LPUS\_05288 LPUS\_05662 LPUS\_06047 **LPUS\_06504** **LPUS\_06582**  
LPUS\_06672 **LPUS\_06811** **LPUS\_07254** LPUS\_07354 **LPUS\_07508** **LPUS\_08926** LPUS\_09246  
LPUS\_09663 LPUS\_10835

GO:0090305 **LPUS\_02236** LPUS\_05106 **LPUS\_06045** **LPUS\_06827** **LPUS\_10385** LPUS\_11313 LPUS\_11863

GO:0006820 **LPUS\_01293** **LPUS\_01915** LPUS\_04000 **LPUS\_05036** LPUS\_05940 **LPUS\_06822** **LPUS\_07109**  
**LPUS\_07110** LPUS\_07296 LPUS\_07557 LPUS\_10369 **LPUS\_10396** **LPUS\_10568** **LPUS\_11315**

GO:0006281 **LPUS\_01880** **LPUS\_03012** **LPUS\_03591** **LPUS\_04302** **LPUS\_04948** **LPUS\_05025** LPUS\_05105  
**LPUS\_05508** **LPUS\_05593** **LPUS\_06045** **LPUS\_06121** **LPUS\_06731** **LPUS\_06827** LPUS\_06845  
**LPUS\_07145** LPUS\_07661 LPUS\_08921 **LPUS\_09521** **LPUS\_10430** LPUS\_10575 LPUS\_10723  
**LPUS\_10846** LPUS\_11021 **LPUS\_11313** **LPUS\_12124**

GO:0043414 LPUS\_02030 LPUS\_04372 **LPUS\_06035** **LPUS\_06802** LPUS\_07508 LPUS\_07537 LPUS\_11303

GO:0009066 **LPUS\_00569** **LPUS\_01877** LPUS\_03969 LPUS\_04806 LPUS\_05835 LPUS\_06658 LPUS\_06665  
LPUS\_08964 LPUS\_09416 LPUS\_10655

GO:0006553 LPUS\_00569 LPUS\_04806 LPUS\_05835 LPUS\_10655

GO:0030258 LPUS\_02077 **LPUS\_05092** LPUS\_05238 **LPUS\_05782** **LPUS\_06665** **LPUS\_06824**

GO:0016226 **LPUS\_01889** LPUS\_02656 LPUS\_04052 LPUS\_05288

GO:0031163 **LPUS\_01889** LPUS\_02656 LPUS\_04052 LPUS\_05288

GO:0008213 **LPUS\_06035** LPUS\_07508 LPUS\_07537

GO:0006479 **LPUS\_06035** LPUS\_07508 LPUS\_07537

GO:0046834 **LPUS\_05238** **LPUS\_06665** **LPUS\_06824**

GO:0046854 **LPUS\_05238** **LPUS\_06665** **LPUS\_06824**

GO:0006614 **LPUS\_06704** **LPUS\_09512** LPUS\_11287 LPUS\_12375

GO:0030259 LPUS\_02077 **LPUS\_05092** **LPUS\_05782**

GO:0016571 **LPUS\_06035** LPUS\_07508 LPUS\_07537

GO:0042176 **LPUS\_04834** LPUS\_05589 LPUS\_06835 LPUS\_11027

GO:0006273 LPUS\_06827 LPUS\_08313 LPUS\_10575

GO:0008608 **LPUS\_02976** **LPUS\_06834** **LPUS\_06881**

GO:0070592 **LPUS\_01977** LPUS\_05092 LPUS\_09679
