# Supplementary material for: Adaptive differentiation coincides with local bioclimatic conditions along an elevational cline in populations of a lichen-forming fungus
Source: Springer Nature journal article supplement (doi:10.1186/s12862-017-0929-8), 2017-03-30

**Additional file 13.** Neighbor-joining tree of the aligned concatenated gene fragments of the six loci at which we genotyped 18 thalli *L. pustulata* used for the anatomical and ecophysiological measurements. Samples in bold and underlined (N = 6) were used for the gas exchange experiments.

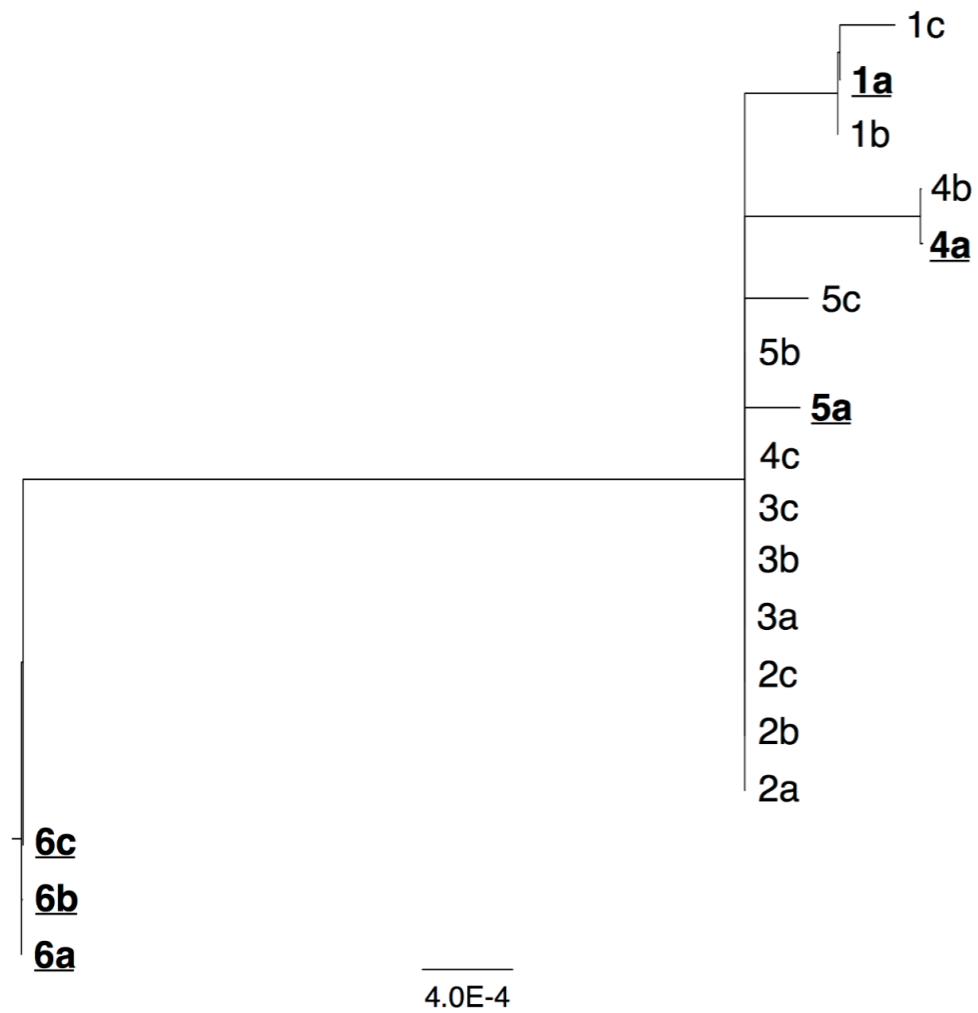

Supplement: MOESM13 [file 12862_2017_929_MOESM13_ESM.pdf]
