# Supplementary material for: Adaptive differentiation coincides with local bioclimatic conditions along an elevational cline in populations of a lichen-forming fungus
Source: Springer Nature journal article supplement (doi:10.1186/s12862-017-0929-8), 2017-03-30
Supplement: MOESM15 [file 12862_2017_929_MOESM15_ESM.pdf]

**Additional file 15.** Net photosynthesis at optimal thallus water content and optimal temperature for genetic group A (pop. 6, high altitude) and B (populations 1 to 5, low altitude).

|                           | Population | 90% of maximal net photosynthesis                    | at [ $\mu\text{mol photons/m} \cdot \text{s}$ ] | maximal net photosynthesis | at [ $\mu\text{mol photons/m} \cdot \text{s}$ ] |
|---------------------------|------------|------------------------------------------------------|-------------------------------------------------|----------------------------|-------------------------------------------------|
| thallus dry weight        | A (high)   | 6.36<br>nmol CO <sub>2</sub> /g · s                  | 580                                             | 7.07                       | 1000                                            |
|                           | B (low)    | 7.56<br>nmol CO <sub>2</sub> /g · s                  | 740                                             | 8.4                        | 1000                                            |
| thallus surface area      | A (high)   | 5.41<br>$\mu\text{mol CO}_2/\text{m} \cdot \text{s}$ | 717                                             | 5.71                       | 1000                                            |
|                           | B (low)    | 1.8<br>$\mu\text{mol CO}_2/\text{m} \cdot \text{s}$  | 727                                             | 2.0                        | 1000                                            |
| chlorophyll<br><i>a+b</i> | A (high)   | 10.76<br>nmol CO <sub>2</sub> /mg Chl · s            | 500                                             | 11.95                      | 1000                                            |
|                           | B (low)    | 32.79<br>nmol CO <sub>2</sub> /mg Chl · s            | 780                                             | 36.43                      | 1000                                            |
